# Supplementary material
Source: PubMed Central journal article supplement (PMC8893041)
Supplement: NIHMS1738252-supplement-Supplemental_Material.pdf [file NIHMS1738252-supplement-Supplemental_Material.pdf]

## **Delay Discounting in Suicidal Behavior: Myopic Preference or Inconsistent Valuation?**

### **Supplemental Information**

Table S1. Sample 1 Sensitivity Analyses: Age, race, education, income, sex

Table S2. Sample 2 Sensitivity Analyses: Age, race, education, income, sex

Table S3. Sample 3 Sensitivity Analyses: Age, race, education, income, sex

Table S4. Sample 1 Sensitivity Analyses: Global Cognitive Functioning

Table S5. Sample 2 Sensitivity Analyses: Global Cognitive Functioning

Table S6. Sample 3 Sensitivity Analyses: Global Cognitive Functioning

Table S7. Sample 1. Excluding five participants for whom possible brain injury from suicide attempts could not be ruled out

Table S8. Sample 1. Controlling for comorbid substance use and anxiety

Table S9. Sample 2. Controlling for comorbid substance use and anxiety

Table S10. Sample 3. Controlling for comorbid substance use and anxiety

Table S11. Sample 1. Excluding non-monotonic responders and those who chose only immediate or only delayed rewards on the MCQ

Table S12. Sample 2. Excluding responders who chose only immediate or only delayed rewards on the MCQ

Table S13. Sample 3. Excluding responders who chose only immediate or only delayed rewards on the MCQ

Table S14. Sample 1. Effects of suicide attempt planning on value sensitivity

Table S15. Sample 2. Effects of suicide attempt planning on value sensitivity

Table S16. Sample 3. Effects of suicide attempt planning on value sensitivity

Table S17. Subject-level log-transformed discount rates and consistencies

Figure S1. Sample 1. Task behavior

Figure S2. Sample 2. Task behavior

Figure S3. Sample 3. Task behavior

**Table S1. Sample 1 Sensitivity Analyses: Age, race, education, income, sex**

| Parameter                         | Median    | 89% CI           | pd    | $\approx$ 2-sided<br><i>p</i> |
|-----------------------------------|-----------|------------------|-------|-------------------------------|
| $\beta$ HL SA+MDD                 | 2.150***  | [1.674, 2.690]   | 1.000 | 0                             |
| $\beta$ Controls (vs. HL SA+MDD)  | 1.933***  | [1.322, 2.497]   | 1.000 | 0                             |
| $\beta$ MDD (vs. HL SA+MDD)       | 2.239***  | [1.666, 2.791]   | 1.000 | 0                             |
| $\beta$ SI+MDD (vs. HL SA+MDD)    | 1.055***  | [0.627, 1.480]   | 1.000 | 0                             |
| $\beta$ LL SA+MDD (vs. HL SA+MDD) | 1.197***  | [0.718, 1.728]   | 1.000 | 0                             |
| $\beta$ Age                       | -0.488*** | [-0.661, -0.307] | 1.000 | 0                             |
| $\beta$ Race                      | 0.796**   | [0.360, 1.218]   | 0.998 | 0.004                         |
| $\beta$ Education                 | 0.083     | [-0.089, 0.266]  | 0.777 | 0.446                         |
| $\beta$ Income                    | 0.354**   | [0.171, 0.543]   | 0.999 | 0.002                         |
| $\beta$ Sex                       | 0.229     | [-0.087, 0.581]  | 0.867 | 0.266                         |
| $k^{subject}$ Controls            | 0.123     | [-0.159, 0.385]  | 0.765 | 0.47                          |
| $k^{subject}$ MDD                 | 0.375*    | [0.140, 0.619]   | 0.993 | 0.014                         |
| $k^{subject}$ SI+MDD              | 0.157     | [-0.152, 0.445]  | 0.799 | 0.402                         |
| $k^{subject}$ LL SA+MDD           | 0.279     | [-0.059, 0.603]  | 0.908 | 0.184                         |

Note:  $k^{subject}$ : subject-level discount rate (calculated as  $-group\ intercept/group\ \beta$ );  $\beta$ : valuation consistency. \* $p < .05$ ; \*\* $p < 0.01$ ; \*\*\* $p < 0.001$  (two-sided  $p$ -value of respectively .05, .01 and .001 corresponds approximately to a  $pd$  of 97.5%, 99.5% and 99.95%).  
Dependent variable: Choice (now versus later).

**Table S2. Sample 2 Sensitivity Analyses: Age, race, education, income, sex**

| Parameter                         | Median    | 89% CI           | pd    | $\approx$ 2-sided<br>$p$ |
|-----------------------------------|-----------|------------------|-------|--------------------------|
| $\beta$ HL SA+MDD                 | 3.619***  | [2.579, 4.698]   | 1.000 | 0                        |
| $\beta$ Controls (vs. HL SA+MDD)  | 2.161***  | [1.187, 3.147]   | 1.000 | 0                        |
| $\beta$ MDD (vs. HL SA+MDD)       | 3.095***  | [2.133, 4.132]   | 1.000 | 0                        |
| $\beta$ LL SA+MDD (vs. HL SA+MDD) | 0.883     | [0.008, 1.782]   | 0.945 | 0.11                     |
| $\beta$ Age                       | -0.950*** | [-1.321, -0.587] | 1.000 | 0                        |
| $\beta$ Race                      | 0.059     | [-0.877, 0.923]  | 0.541 | 0.918                    |
| $\beta$ Education                 | -0.309    | [-0.641, 0.028]  | 0.930 | 0.14                     |
| $\beta$ Income                    | 0.111     | [-0.282, 0.500]  | 0.670 | 0.66                     |
| $\beta$ Sex                       | -0.129    | [-0.791, 0.526]  | 0.625 | 0.75                     |
| $k^{subject}$ Controls            | 0.084     | [-0.178, 0.361]  | 0.693 | 0.614                    |
| $k^{subject}$ MDD                 | 0.274     | [0.055, 0.489]   | 0.975 | 0.05                     |
| $k^{subject}$ LL SA+MDD           | -0.039    | [-0.376, 0.311]  | 0.573 | 0.854                    |

Note:  $k^{subject}$ : subject-level discount rate (calculated as  $-group\ intercept/group\ \beta$ );  $\beta$ : valuation consistency. \* $p < .05$ ; \*\* $p < 0.01$ ; \*\*\* $p < 0.001$  (two-sided  $p$ -value of respectively .05, .01 and .001 corresponds approximately to a  $pd$  of 97.5%, 99.5% and 99.95%).  
Dependent variable: Choice (now versus later).

**Table S3. Sample 3 Sensitivity Analyses: Age, race, education, income, sex**

| Parameter                         | Median   | 89% CI           | pd    | $\approx$ 2-sided<br>$p$ |
|-----------------------------------|----------|------------------|-------|--------------------------|
| $\beta$ HL SA+MDD                 | 3.789*** | [3.116, 4.491]   | 1.000 | 0                        |
| $\beta$ Controls (vs. HL SA+MDD)  | 0.967*   | [0.293, 1.580]   | 0.993 | 0.014                    |
| $\beta$ MDD (vs. HL SA+MDD)       | 1.162**  | [0.532, 1.787]   | 0.999 | 0.002                    |
| $\beta$ LL SA+MDD (vs. HL SA+MDD) | 1.703*** | [0.948, 2.477]   | 1.000 | 0                        |
| $\beta$ Age                       | 0.294*   | [0.072, 0.540]   | 0.982 | 0.036                    |
| $\beta$ Race                      | 0.304    | [-0.158, 0.791]  | 0.851 | 0.298                    |
| $\beta$ Education                 | 0.545*** | [0.289, 0.799]   | 1.000 | 0                        |
| $\beta$ Income                    | 0.124    | [-0.117, 0.350]  | 0.795 | 0.41                     |
| $\beta$ Sex                       | 0.151    | [-0.332, 0.596]  | 0.705 | 0.59                     |
| $\beta$ Site Code                 | -0.656   | [-1.223, -0.131] | 0.973 | 0.054                    |
| $k^{subject}$ Controls            | -0.095   | [-0.389, 0.191]  | 0.707 | 0.586                    |
| $k^{subject}$ MDD                 | -0.139   | [-0.413, 0.140]  | 0.794 | 0.412                    |
| $k^{subject}$ LL SA+MDD           | 0.017    | [-0.245, 0.286]  | 0.545 | 0.91                     |

Note:  $k^{subject}$ : subject-level discount rate (calculated as  $-group\ intercept/group\ \beta$ );  $\beta$ : valuation consistency. \* $p < .05$ ; \*\* $p < 0.01$ ; \*\*\* $p < 0.001$  (two-sided  $p$ -value of respectively .05, .01 and .001 corresponds approximately to a  $pd$  of 97.5%, 99.5% and 99.95%).  
Dependent variable: Choice (now versus later).

**Table S4. Sample 1 Sensitivity Analyses: Global Cognitive Functioning**

| Parameter                         | Median   | 89% CI          | pd    | $\approx$ 2-sided<br>$p$ |
|-----------------------------------|----------|-----------------|-------|--------------------------|
| $\beta$ HL SA+MDD                 | 2.876*** | [2.658, 3.103]  | 1.000 | 0                        |
| $\beta$ Controls (vs. HL SA+MDD)  | 1.599*** | [1.188, 2.010]  | 1.000 | 0                        |
| $\beta$ MDD (vs. HL SA+MDD)       | 1.613*** | [1.197, 2.063]  | 1.000 | 0                        |
| $\beta$ SI+MDD (vs. HL SA+MDD)    | 1.169*** | [0.813, 1.514]  | 1.000 | 0                        |
| $\beta$ LL SA+MDD (vs. HL SA+MDD) | 1.380*** | [0.966, 1.804]  | 1.000 | 0                        |
| $\beta$ MMSE Score                | 0.610*** | [0.499, 0.714]  | 1.000 | 0                        |
| $k^{subject}$ Controls            | 0.10     | [-0.171, 0.208] | 0.530 | 0.94                     |
| $k^{subject}$ MDD                 | 0.204    | [0.022, 0.410]  | 0.951 | 0.098                    |
| $k^{subject}$ SI+MDD              | 0.186    | [-0.022, 0.390] | 0.929 | 0.142                    |
| $k^{subject}$ LL SA+MDD           | 0.333**  | [0.131, 0.538]  | 0.996 | 0.008                    |

Note:  $k^{subject}$ : subject-level discount rate (calculated as  $-group\ intercept/group\ \beta$ );  $\beta$ : valuation consistency. \* $p < .05$ ; \*\* $p < 0.01$ ; \*\*\* $p < 0.001$  (two-sided  $p$ -value of respectively .05, .01 and .001 corresponds approximately to a  $pd$  of 97.5%, 99.5% and 99.95%).

Dependent variable: Choice (now versus later).

**Table S5. Sample 2 Sensitivity Analyses: Global Cognitive Functioning**

| Parameter                         | Median   | 89% CI          | pd    | $\approx$ 2-sided<br>$p$ |
|-----------------------------------|----------|-----------------|-------|--------------------------|
| $\beta$ HL SA+MDD                 | 4.195*** | [3.573, 4.757]  | 1.000 | 0                        |
| $\beta$ Controls (vs. HL SA+MDD)  | 0.626    | [-0.182, 1.383] | 0.901 | 0.198                    |
| $\beta$ MDD (vs. HL SA+MDD)       | 2.396*** | [1.401, 3.323]  | 1.000 | 0                        |
| $\beta$ LL SA+MDD (vs. HL SA+MDD) | 1.181*   | [0.380, 2.011]  | 0.989 | 0.022                    |
| $\beta$ MMSE Score                | 0.852*** | [0.615, 1.077]  | 1.000 | 0                        |
| $k^{subject}$ Controls            | -0.183   | [-0.468, 0.113] | 0.845 | 0.31                     |
| $k^{subject}$ MDD                 | 0.231    | [0.007, 0.434]  | 0.955 | 0.09                     |
| $k^{subject}$ LL SA+MDD           | 0.074    | [-0.213, 0.367] | 0.664 | 0.672                    |

Note:  $k^{subject}$ : subject-level discount rate (calculated as  $-group\ intercept/group\ \beta$ );  $\beta$ : valuation consistency. \* $p < .05$ ; \*\* $p < 0.01$ ; \*\*\* $p < 0.001$  (two-sided  $p$ -value of respectively .05, .01 and .001 corresponds approximately to a  $pd$  of 97.5%, 99.5% and 99.95%).

Dependent variable: Choice (now versus later).

**Table S6. Sample 3 Sensitivity Analyses: Global Cognitive Functioning**

| Parameter                         | Median   | 89% CI           | pd    | $\approx$ 2-sided<br>$p$ |
|-----------------------------------|----------|------------------|-------|--------------------------|
| $\beta$ HL SA+MDD                 | 3.859*** | [3.282, 4.459]   | 1.000 | 0                        |
| $\beta$ Controls (vs. HL SA+MDD)  | 1.297**  | [0.710, 1.926]   | 0.999 | 0.002                    |
| $\beta$ MDD (vs. HL SA+MDD)       | 1.467*** | [0.842, 2.051]   | 1.000 | 0                        |
| $\beta$ LL SA+MDD (vs. HL SA+MDD) | 1.572*** | [0.880, 2.284]   | 1.000 | 0                        |
| $\beta$ MMSE Score                | 0.227    | [0.021, 0.428]   | 0.956 | 0.088                    |
| $\beta$ Site Code                 | -0.825** | [-1.312, -0.361] | 0.998 | 0.004                    |
| $k^{subject}$ Controls            | -0.122   | [-0.388, 0.138]  | 0.770 | 0.46                     |
| $k^{subject}$ MDD                 | -0.138   | [-0.374, 0.123]  | 0.816 | 0.368                    |
| $k^{subject}$ LL SA+MDD           | 0.009    | [-0.255, 0.281]  | 0.522 | 0.956                    |

Note:  $k^{subject}$ : subject-level discount rate (calculated as  $-group\ intercept/group\ \beta$ );  $\beta$ : valuation consistency. \* $p < .05$ ; \*\* $p < 0.01$ ; \*\*\* $p < 0.001$  (two-sided  $p$ -value of respectively .05, .01 and .001 corresponds approximately to a  $pd$  of 97.5%, 99.5% and 99.95%).

Dependent variable: Choice (now versus later).

**Table S7. Sample 1. Excluding five participants for whom possible brain injury from suicide attempts could not be ruled out**

| Parameter                         | Median   | 89% CI          | pd    | $\approx$ 2-sided $p$ |
|-----------------------------------|----------|-----------------|-------|-----------------------|
| $\beta$ HL SA+MDD                 | 2.562*** | [2.342, 2.757]  | 1     | 0                     |
| $\beta$ Controls (vs. HL SA+MDD)  | 1.940*** | [1.502, 2.340]  | 1     | 0                     |
| $\beta$ MDD (vs. HL SA+MDD)       | 2.006*** | [1.606, 2.428]  | 1     | 0                     |
| $\beta$ SI+MDD (vs. HL SA+MDD)    | 1.365*** | [1.014, 1.723]  | 1     | 0                     |
| $\beta$ LL SA+MDD (vs. HL SA+MDD) | 1.247*** | [0.853, 1.644]  | 1     | 0                     |
| $k^{subject}$ Controls            | 0.063    | [-0.122, 0.269] | 0.700 | 0.6                   |
| $k^{subject}$ MDD                 | 0.243    | [0.035, 0.430]  | 0.972 | 0.056                 |
| $k^{subject}$ SI+MDD              | 0.221    | [0.007, 0.437]  | 0.948 | 0.104                 |
| $k^{subject}$ LL SA+MDD           | 0.373*   | [0.121, 0.593]  | 0.993 | 0.014                 |

Note:  $k^{subject}$ : subject-level discount rate (calculated as  $-group\ intercept/group\ \beta$ );  $\beta$ : valuation consistency. \* $p < .05$ ; \*\* $p < 0.01$ ; \*\*\* $p < 0.001$  (two-sided  $p$ -value of respectively .05, .01 and .001 corresponds approximately to a  $pd$  of 97.5%, 99.5% and 99.95%).  
 Dependent variable: Choice (now versus later).



**Table S8. Sample 1. Controlling for comorbid substance use and anxiety**

| Parameter                           | Median    | 89% CI           | pd    | $\approx$ 2-sided<br>$p$ |
|-------------------------------------|-----------|------------------|-------|--------------------------|
| $\beta$ HL SA+MDD                   | 3.520***  | [3.130, 3.922]   | 1.000 | 0                        |
| $\beta$ MDD (vs. HL SA+MDD)         | 1.837***  | [1.403, 2.229]   | 1.000 | 0                        |
| $\beta$ SI+MDD (vs. HL SA+MDD)      | 1.261***  | [0.887, 1.603]   | 1.000 | 0                        |
| $\beta$ LL SA+MDD (vs. HL SA+MDD)   | 1.280***  | [0.895, 1.704]   | 1.000 | 0                        |
| $\beta$ Anxiety Disorder (Lifetime) | -1.369*** | [-1.749, -0.979] | 1.000 | 0                        |
| $\beta$ Substance Use (Lifetime)    | 0.411*    | [0.138, 0.712]   | 0.989 | 0.022                    |
| $k^{subject}$ MDD                   | 0.142     | [-0.022, 0.305]  | 0.914 | 0.172                    |
| $k^{subject}$ SI+MDD                | 0.106     | [-0.069, 0.277]  | 0.833 | 0.334                    |
| $k^{subject}$ LL SA+MDD             | 0.234     | [0.035, 0.427]   | 0.970 | 0.06                     |

Note:  $k^{subject}$ : subject-level discount rate (calculated as  $-group\ intercept/group\ \beta$ );  $\beta$ : valuation consistency. \* $p < .05$ ; \*\* $p < 0.01$ ; \*\*\* $p < 0.001$  (two-sided  $p$ -value of respectively .05, .01 and .001 corresponds approximately to a  $pd$  of 97.5%, 99.5% and 99.95%).  
Dependent variable: Choice (now versus later).

**Table S9. Sample 2. Controlling for comorbid substance use and anxiety**

| Parameter                           | Median   | 89% CI           | pd    | $\approx$ 2-sided<br>$p$ |
|-------------------------------------|----------|------------------|-------|--------------------------|
| $\beta$ HL SA+MDD                   | 4.294*** | [3.375, 5.148]   | 1.000 | 0                        |
| $\beta$ MDD (vs. HL SA+MDD)         | 2.116*** | [1.032, 3.100]   | 1.000 | 0                        |
| $\beta$ LL SA+MDD (vs. HL SA+MDD)   | 0.104    | [-0.828, 1.054]  | 0.572 | 0.856                    |
| $\beta$ Anxiety Disorder (Lifetime) | 1.230*   | [0.440, 2.006]   | 0.994 | 0.012                    |
| $\beta$ Substance Use (Lifetime)    | -1.060*  | [-1.824, -0.279] | 0.986 | 0.028                    |
| $k^{subject}$ MDD                   | 0.215    | [-0.001, 0.457]  | 0.930 | 0.14                     |
| $k^{subject}$ LL SA+MDD             | -0.018   | [-0.387, 0.350]  | 0.532 | 0.936                    |

Note:  $k^{subject}$ : subject-level discount rate (calculated as  $-group\ intercept/group\ \beta$ );  $\beta$ : valuation consistency. \* $p < .05$ ; \*\* $p < 0.01$ ; \*\*\* $p < 0.001$  (two-sided  $p$ -value of respectively .05, .01 and .001 corresponds approximately to a  $pd$  of 97.5%, 99.5% and 99.95%).  
Dependent variable: Choice (now versus later).

**Table S10. Sample 3. Controlling for comorbid substance use and anxiety**

| Parameter                           | Median   | 89% CI           | pd    | $\approx$ 2-sided $p$ |
|-------------------------------------|----------|------------------|-------|-----------------------|
| $\beta$ HL SA+MDD                   | 4.598*** | [3.619, 5.585]   | 1.000 | 0                     |
| $\beta$ MDD (vs. HL SA+MDD)         | 1.377*** | [0.762, 2.015]   | 1.000 | 0                     |
| $\beta$ LL SA+MDD (vs. HL SA+MDD)   | 1.477*** | [0.732, 2.194]   | 1.000 | 0                     |
| $\beta$ Anxiety Disorder (Lifetime) | -1.304*  | [-2.161, -0.477] | 0.995 | 0.01                  |
| $\beta$ Substance Use (Lifetime)    | 1.216**  | [0.462, 1.969]   | 0.997 | 0.006                 |
| $\beta$ Site Code                   | -0.504   | [-1.130, 0.077]  | 0.912 | 0.176                 |
| $k^{subject}$ MDD                   | -0.168   | [-0.441, 0.076]  | 0.862 | 0.276                 |
| $k^{subject}$ LL SA+MDD             | -0.030   | [-0.279, 0.256]  | 0.574 | 0.852                 |

Note:  $k^{subject}$ : subject-level discount rate (calculated as  $-group\ intercept/group\ \beta$ );  $\beta$ : valuation consistency. \* $p < .05$ ; \*\* $p < 0.01$ ; \*\*\* $p < 0.001$  (two-sided  $p$ -value of respectively .05, .01 and .001 corresponds approximately to a  $pd$  of 97.5%, 99.5% and 99.95%).

Dependent variable: Choice (now versus later).

**Table S11. Sample 1. Excluding non-monotonic responders and those who chose only immediate or only delayed rewards on the MCQ**

| Parameter                         | Median   | 89% CI          | pd    | $\approx$ 2-sided $p$ |
|-----------------------------------|----------|-----------------|-------|-----------------------|
| $\beta$ HL SA+MDD                 | 3.605*** | [3.323, 3.907]  | 1.000 | 0                     |
| $\beta$ Controls (vs. HL SA+MDD)  | 1.065*** | [0.586, 1.529]  | 1.000 | 0                     |
| $\beta$ MDD (vs. HL SA+MDD)       | 0.681*   | [0.238, 1.105]  | 0.993 | 0.014                 |
| $\beta$ SI+MDD (vs. HL SA+MDD)    | 0.796**  | [0.390, 1.266]  | 0.999 | 0.002                 |
| $\beta$ LL SA+MDD (vs. HL SA+MDD) | 0.195    | [-0.228, 0.660] | 0.762 | 0.476                 |
| $k^{subject}$ Controls            | -0.069   | [-0.222, 0.080] | 0.764 | 0.472                 |
| $k^{subject}$ MDD                 | -0.006   | [-0.175, 0.147] | 0.524 | 0.952                 |
| $k^{subject}$ SI+MDD              | 0.045    | [-0.103, 0.208] | 0.684 | 0.632                 |
| $k^{subject}$ LL SA+MDD           | 0.066    | [-0.128, 0.257] | 0.707 | 0.586                 |

Note:  $k^{subject}$ : subject-level discount rate (calculated as  $-group\ intercept/group\ \beta$ );  $\beta$ : valuation consistency. \* $p < .05$ ; \*\* $p < 0.01$ ; \*\*\* $p < 0.001$  (two-sided  $p$ -value of respectively .05, .01 and .001 corresponds approximately to a  $pd$  of 97.5%, 99.5% and 99.95%).  
 Dependent variable: Choice (now versus later).

**Table S12. Sample 2. Excluding responders who chose only immediate or only delayed rewards on the MCQ**

| Parameter                         | Median   | 89% CI          | pd    | $\approx$ 2-sided $p$ |
|-----------------------------------|----------|-----------------|-------|-----------------------|
| $\beta$ HL SA+MDD                 | 3.823*** | [3.272, 4.394]  | 1.000 | 0                     |
| $\beta$ Controls (vs. HL SA+MDD)  | 1.432**  | [0.678, 2.226]  | 0.997 | 0.006                 |
| $\beta$ MDD (vs. HL SA+MDD)       | 2.411*** | [1.513, 3.324]  | 1.000 | 0                     |
| $\beta$ LL SA+MDD (vs. HL SA+MDD) | 0.459    | [-0.350, 1.197] | 0.823 | 0.354                 |
| $k^{subject}$ Controls            | 0.058    | [-0.154, 0.261] | 0.666 | 0.668                 |
| $k^{subject}$ MDD                 | 0.212    | [0.035, 0.391]  | 0.964 | 0.072                 |
| $k^{subject}$ LL SA+MDD           | 0.097    | [-0.187, 0.358] | 0.711 | 0.578                 |

Note:  $k^{subject}$ : subject-level discount rate (calculated as  $-group\ intercept/group\ \beta$ );  $\beta$ : valuation consistency. \* $p < .05$ ; \*\* $p < 0.01$ ; \*\*\* $p < 0.001$  (two-sided  $p$ -value of respectively .05, .01 and .001 corresponds approximately to a  $pd$  of 97.5%, 99.5% and 99.95%).  
 Dependent variable: Choice (now versus later).

**Table S13. Sample 3. Excluding responders who chose only immediate or only delayed rewards on the MCQ.**

| Parameter                         | Median   | 89% CI           | pd    | $\approx$ 2-sided<br>$p$ |
|-----------------------------------|----------|------------------|-------|--------------------------|
| $\beta$ HL SA+MDD                 | 3.723*** | [3.117, 4.302]   | 1.000 | 0                        |
| $\beta$ Controls (vs. HL SA+MDD)  | 1.210**  | [0.589, 1.783]   | 0.999 | 0.002                    |
| $\beta$ MDD (vs. HL SA+MDD)       | 1.582*** | [0.943, 2.180]   | 1.000 | 0                        |
| $\beta$ LL SA+MDD (vs. HL SA+MDD) | 1.561*** | [0.870, 2.293]   | 1.000 | 0                        |
| $\beta$ Site Code                 | -0.714*  | [-1.172, -0.247] | 0.993 | 0.014                    |
| $k^{subject}$ Controls            | -0.179   | [-0.391, 0.062]  | 0.891 | 0.218                    |
| $k^{subject}$ MDD                 | -0.101   | [-0.320, 0.103]  | 0.777 | 0.446                    |
| $k^{subject}$ LL SA+MDD           | -0.018   | [-0.242, 0.213]  | 0.549 | 0.902                    |

Note:  $k^{subject}$ : subject-level discount rate (calculated as  $-group\ intercept/group\ \beta$ );  $\beta$ : valuation consistency. \* $p < .05$ ; \*\* $p < 0.01$ ; \*\*\* $p < 0.001$  (two-sided  $p$ -value of respectively .05, .01 and .001 corresponds approximately to a  $pd$  of 97.5%, 99.5% and 99.95%).

Dependent variable: Choice (now versus later).

**Table S14. Sample 1. Effects of suicide attempt planning on value sensitivity**

| Parameter                                           | Median   | 89% CI           | pd   | $\approx$ 2-sided $p$ |
|-----------------------------------------------------|----------|------------------|------|-----------------------|
| $k_{indifference}^{item}$                           | 3.048*** | [2.842, 3.243]   | 1    | 0                     |
| <i>Attempt Planning</i>                             | 0.674**  | [0.292, 1.065]   | .997 | 0.006                 |
| $k_{indifference}^{item}$ * <i>Attempt Planning</i> | -0.327** | [-0.515, -0.134] | .998 | 0.004                 |

  

| Parameter                                            | Median    | 89% CI           | pd   | $\approx$ 2-sided $p$ |
|------------------------------------------------------|-----------|------------------|------|-----------------------|
| $k_{indifference}^{item}$                            | 3.167***  | [2.958, 3.380]   | 1    | 0                     |
| <i>Attempt Planning</i>                              | 0.456     | [0.057, 0.864]   | .963 | 0.074                 |
| <i>Highest Lethality</i>                             | 0.672*    | [0.257, 1.107]   | .994 | 0.012                 |
| $k_{indifference}^{item}$ * <i>Attempt Planning</i>  | -0.156    | [-0.340, 0.033]  | .914 | 0.172                 |
| $k_{indifference}^{item}$ * <i>Highest Lethality</i> | -0.628*** | [-0.821, -0.434] | 1    | 0                     |

Note: \* $p < .05$ ; \*\* $p < 0.01$ ; \*\*\* $p < 0.001$  (two-sided  $p$ -value of respectively .05, .01 and .001 corresponds approximately to a  $pd$  of 97.5%, 99.5% and 99.95%). Dependent variable: Choice (now versus later).

**Table S15. Sample 2. Effects of suicide attempt planning on value sensitivity**

| Parameter                                             | Median   | 89% CI          | pd    | $\approx$ 2-sided $p$ |
|-------------------------------------------------------|----------|-----------------|-------|-----------------------|
| $k_{indifference}^{item}$                             | 4.007*** | [3.596, 4.439]  | 1     | 0                     |
| <i>Attempt Planning</i>                               | -0.405   | [-0.994, 0.171] | 0.869 | 0.262                 |
| $k_{indifference}^{item} * \textit{Attempt Planning}$ | -0.005   | [-0.370, 0.364] | 0.508 | 0.984                 |

Note: \* $p < .05$ ; \*\* $p < 0.01$ ; \*\*\* $p < 0.001$  (two-sided  $p$ -value of respectively .05, .01 and .001 corresponds approximately to a  $pd$  of 97.5%, 99.5% and 99.95%). Dependent variable: Choice (now versus later).



**Table S16. Sample 3. Effects of suicide attempt planning on value sensitivity**

| Parameter                                           | Median   | 89% CI           | pd    | $\approx$ 2-sided $p$ |
|-----------------------------------------------------|----------|------------------|-------|-----------------------|
| $k_{indifference}^{item}$                           | 5.338*** | [4.481, 6.222]   | 1     | 0                     |
| <i>Attempt Planning</i>                             | 0.067    | [-0.635, 0.772]  | 0.559 | 0.882                 |
| <i>Site Code</i>                                    | 0.101    | [-0.622, 0.765]  | 0.590 | 0.82                  |
| $k_{indifference}^{item}$ * <i>Attempt Planning</i> | -0.361   | [-0.690, -0.041] | 0.957 | 0.086                 |
| $k_{indifference}^{item}$ * <i>Site Code</i>        | -0.532*  | [-0.876, -0.188] | 0.993 | 0.014                 |

Note: \* $p < .05$ ; \*\* $p < 0.01$ ; \*\*\* $p < 0.001$  (two-sided  $p$ -value of respectively .05, .01 and .001 corresponds approximately to a  $pd$  of 97.5%, 99.5% and 99.95%). Dependent variable: Choice (now versus later).

**Table S17. Subject-level log-transformed discount rates and consistencies**

| <b>Sample 1</b>                    |                            |                   |                             |                             |                             |
|------------------------------------|----------------------------|-------------------|-----------------------------|-----------------------------|-----------------------------|
|                                    | <b>Controls<br/>(n=66)</b> | <b>MDD (n=66)</b> | <b>MDD+SI<br/>(n=76)</b>    | <b>MDD+LL<br/>SA (n=55)</b> | <b>MDD+HL<br/>SA (n=61)</b> |
| Discount rates<br>( <i>M, SD</i> ) | -5.42 (1.62)               | -4.97 (1.42)      | -4.97 (1.84)                | -4.68 (1.75)                | -5.00 (1.94)                |
| Consistencies<br>( <i>M, SD</i> )  | .96 (.04)*                 | .95 (.04)*        | .95 (.06)                   | .95 (.05)                   | .92 (.09)*                  |
| <b>Sample 2</b>                    |                            |                   |                             |                             |                             |
|                                    | <b>Controls<br/>(n=39)</b> | <b>MDD (n=38)</b> | <b>MDD+LL<br/>SA (n=24)</b> | <b>MDD+HL<br/>SA (n=17)</b> |                             |
| Discount rates<br>( <i>M, SD</i> ) | -5.40 (1.57)               | -4.67 (1.19)      | -4.75 (1.44)                | -4.70 (1.32)                |                             |
| Consistencies<br>( <i>M, SD</i> )  | .95 (.04)*                 | .98 (.02)*        | .95 (.04)*                  | .94 (.06)*                  |                             |
| <b>Sample 3</b>                    |                            |                   |                             |                             |                             |
|                                    | <b>Controls<br/>(n=59)</b> | <b>MDD (n=57)</b> | <b>MDD+LL<br/>SA (n=42)</b> | <b>MDD+HL<br/>SA (n=22)</b> |                             |
| Discount rates<br>( <i>M, SD</i> ) | -5.25 (1.54)               | -5.39 (1.80)      | -4.91 (1.60)                | -4.33 (2.00)                |                             |
| Consistencies<br>( <i>M, SD</i> )  | .96 (.04)                  | .96 (.04)         | .95 (.03)                   | .95 (.06)                   |                             |

*Note.* Consistencies indicate the proportion of participants' choices that are consistent with the hyperbolic discount rate.  
\* $p < 0.05$  level.

**Figure S1. Sample 1. Task behavior**

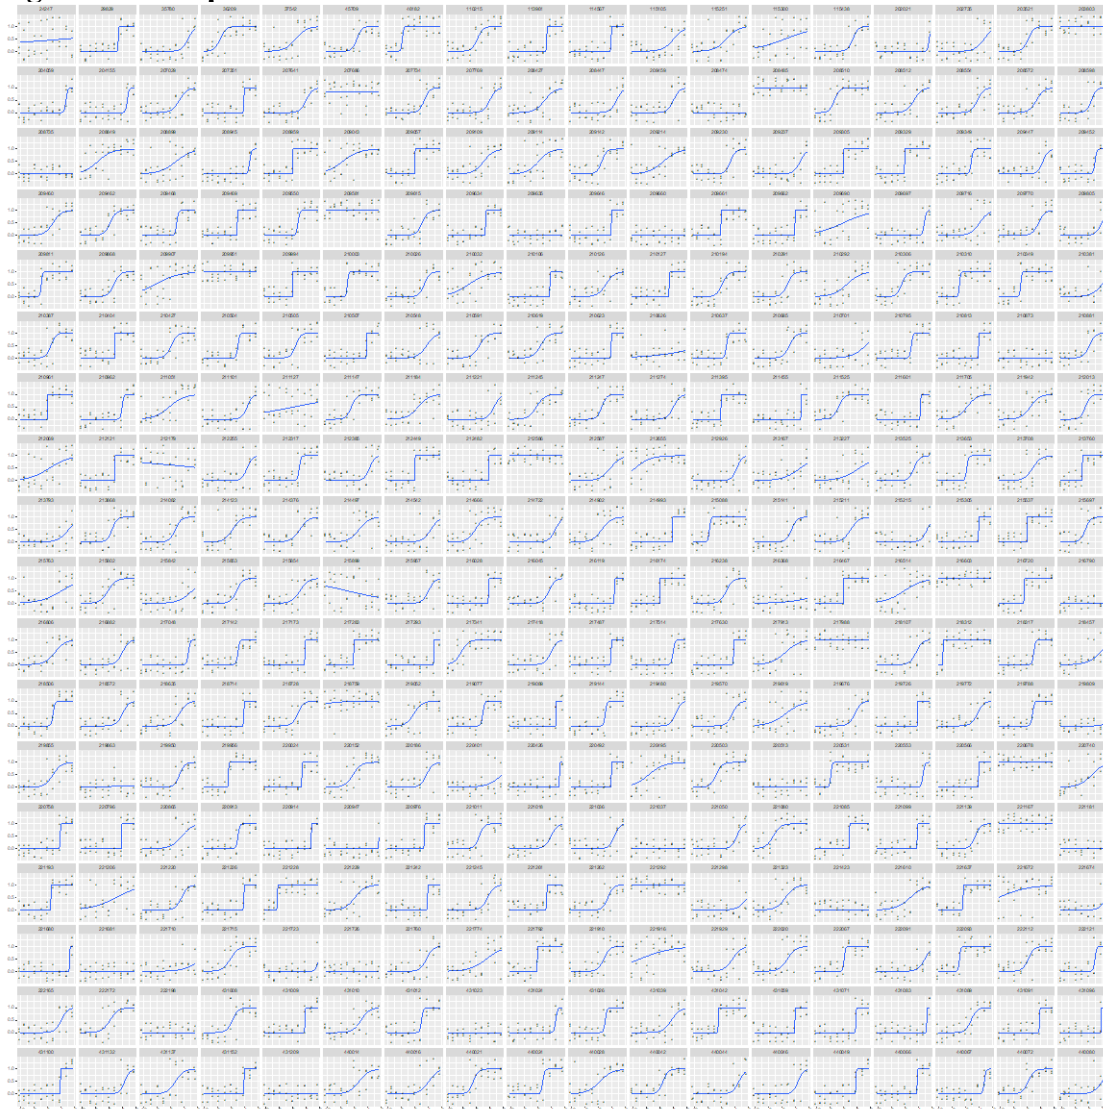

*Note.* Hyperbolic value difference is on the abscissa and predicted delayed choice probability is on the ordinate.

**Figure S2. Sample 2. Task behavior**

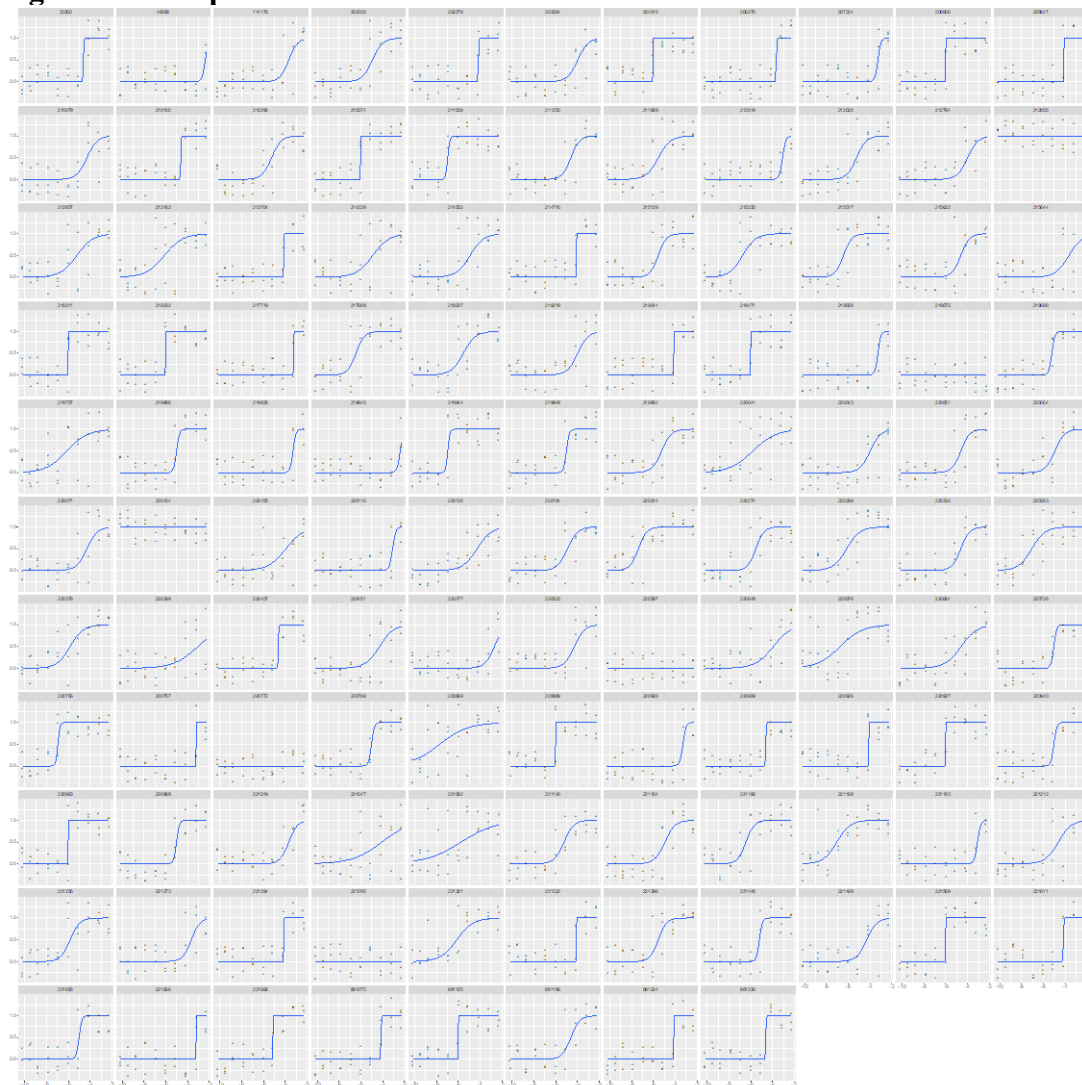

*Note.* Hyperbolic value difference is on the abscissa and predicted delayed choice probability is on the ordinate.

**Figure S3. Sample 3. Task behavior**

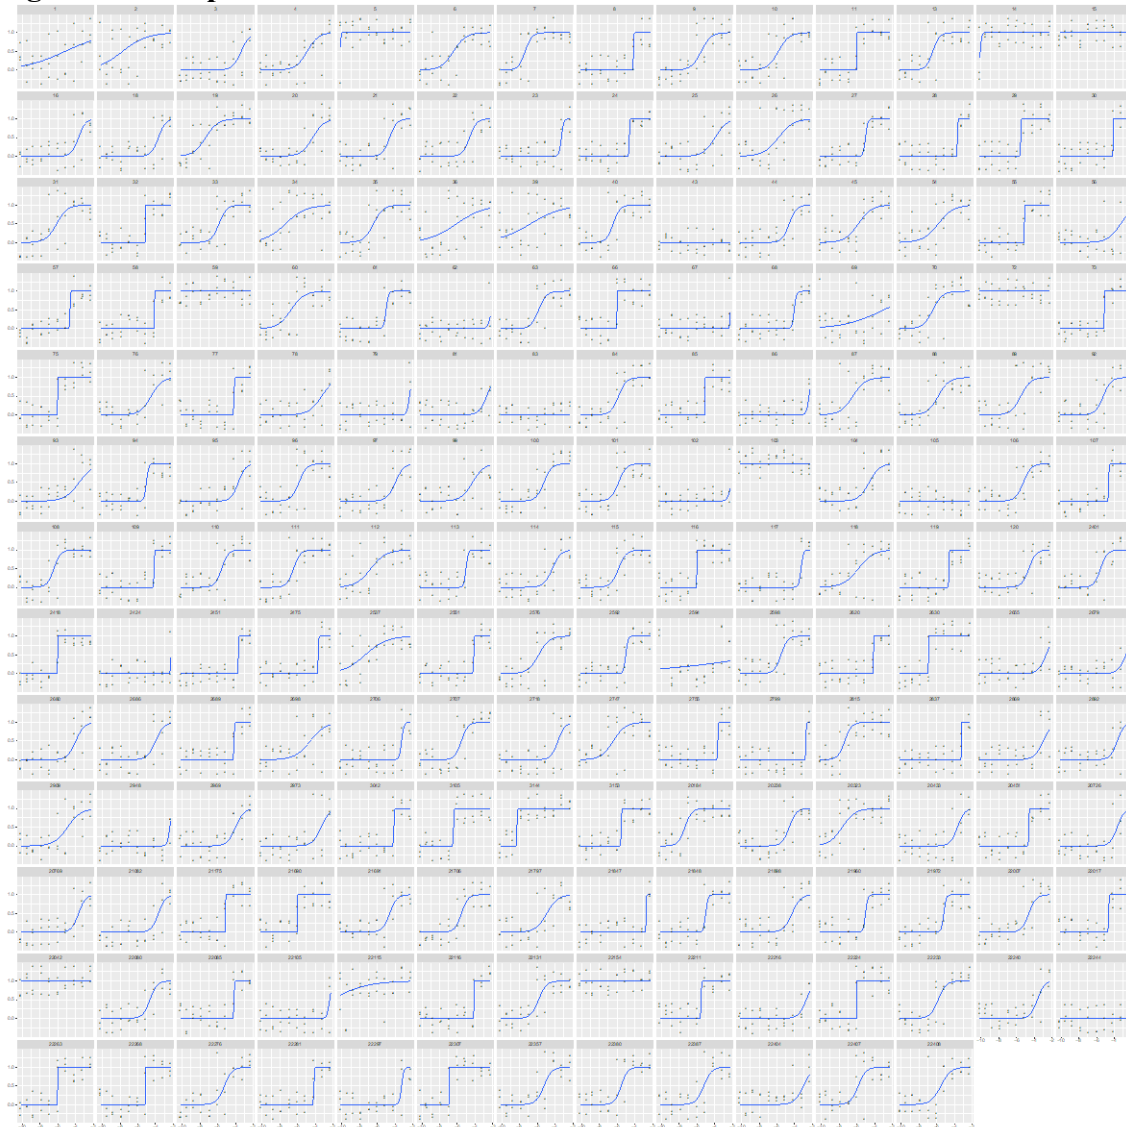

*Note.* Hyperbolic value difference is on the abscissa and predicted delayed choice probability is on the ordinate.
